# Supplementary material for: Influence of Carbon Black and Silica Fillers with Different Concentrations on Dielectric Relaxation in Nitrile Butadiene Rubber Investigated by Impedance Spectroscopy
Source: MDPI journal article supplement (doi:10.3390/polym14010155), 2021-12-31
Supplement: s1 [file s1]

## Supplementary Materials

Figure S1 represents the simulation example for the measured complex permittivity in NBR-H2O. On the left side of Figure S1, the real and imaginary parts of the permittivity are shown in a three-dimensional graph as a function of both temperature (233 K – 403 K) and frequency (0.01 Hz - 1 MHz). The value on x, y and z axis indicates frequency, temperature and permittivity, respectively. The red solid line indicates the real part of the permittivity on z axis, and the blue line corresponds to the imaginary part. To precisely extract the complex permittivity from the measured capacitance and loss tangent data, the area and thickness for the specimen shown below the three-dimensional graph was entered when the data were imported.

The right side of Figure S1 shows the corresponding two-dimensional permittivity spectra versus frequency in NBR-H2O at 298 K, deconvoluted by two HN models and one conductivity term in equation (6) using a modified dispersion analyzer program [1, 2]. The red and blue cross symbols (x) indicate the real and imaginary parts of the measured permittivity, respectively. The red and blue solid lines show the simulated results obtained by superposing the two HN and conductivity models. The simulation was based upon the least square method that reduced the difference between the measured data and fitting results. In the model information, the parameters  $\sigma$ ,  $N$ , and  $\epsilon_0$  for the global model shown in the first term of equation (6) and the parameters ( $\alpha$ ,  $\beta$ ,  $f_0$ , and  $\epsilon_0 - \epsilon_\infty$ ) for the HN model in the third term of equation (6) are obtained. The parameters for the selected model functions are displayed in an unknown parameter list. The min and max values indicate a limited range of simulation, and their values correspond to the results obtained from the simulation at the corresponding temperature.

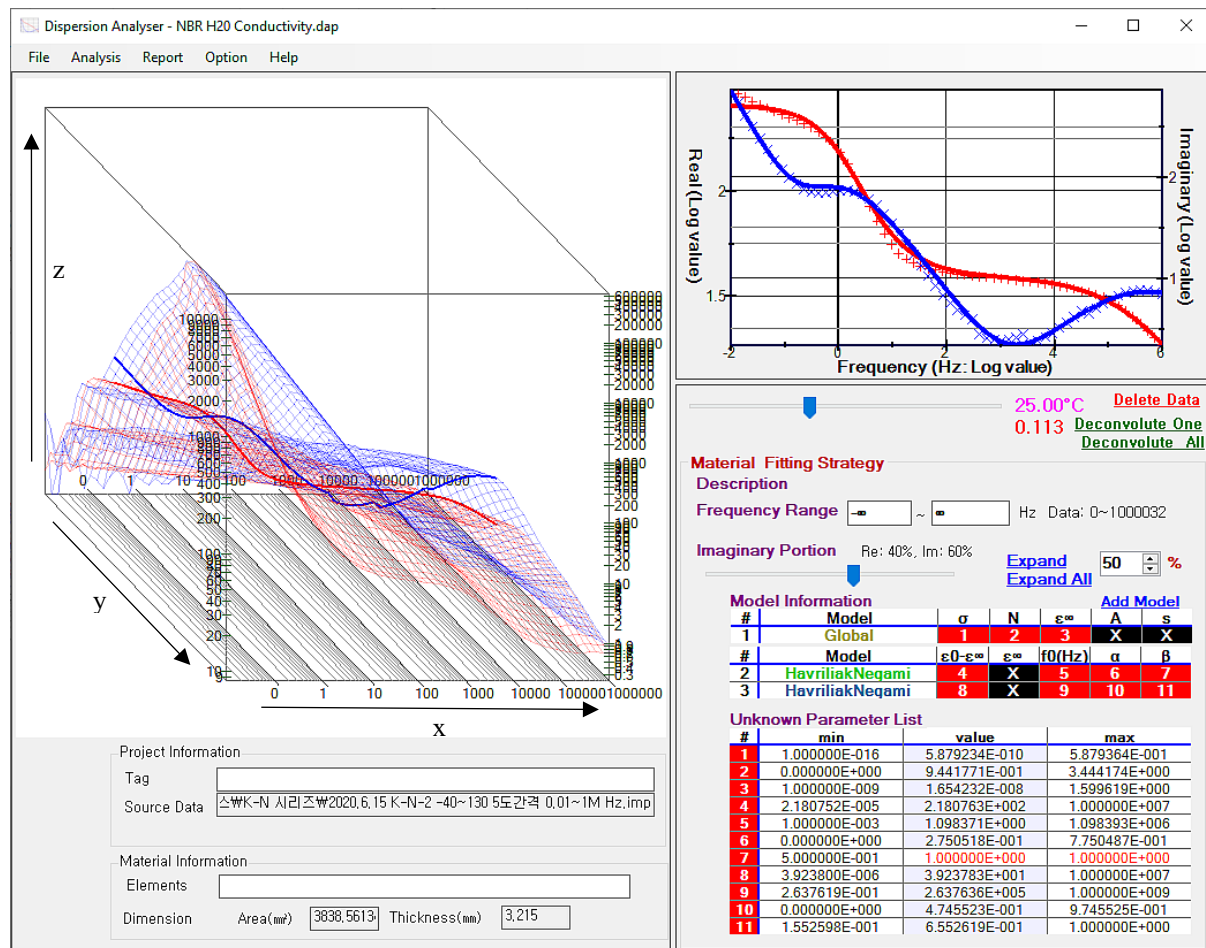

**Figure S1.** Simulation result for the measured complex permittivity in NBR-H2O at 298 K using the modified dispersion analysis program.

Table S1. ASTM classification for type of carbon blacks.

| Name                     | Standard abbreviation | ASTM designation | Particle size(nm) | Tensile strength(Mpa) | Relative laboratory abrasion | Relative roadwear abrasion |
|--------------------------|-----------------------|------------------|-------------------|-----------------------|------------------------------|----------------------------|
| Super Abrasion Furnace   | SAF                   | N110             | 20-25             | 25.2                  | 1.35                         | 1.25                       |
| Intermediate SAF         | ISAF                  | N220             | 24-33             | 23.1                  | 1.25                         | 1.15                       |
| High Abrasion Furnace    | HAF                   | N330             | 28-36             | 22.4                  | 1.00                         | 1.00                       |
| Easy Processing Channel  | EPC                   | N300             | 30-35             | 21.7                  | 0.80                         | 0.90                       |
| Fast Extruding Furnace   | FEF                   | N550             | 39-55             | 18.2                  | 0.64                         | 0.72                       |
| High Modules Furnace     | HMF                   | N660             | 49-73             | 16.1                  | 0.56                         | 0.66                       |
| Semi-Reinforcing Furnace | SRF                   | N770             | 70-96             | 14.7                  | 0.48                         | 0.60                       |
| Fine Thermal             | FT                    | N880             | 180-200           | 12.6                  | 0.22                         | -                          |
| Medium Thermal           | MT                    | N990             | 250-350           | 9.8                   | 0.18                         | -                          |

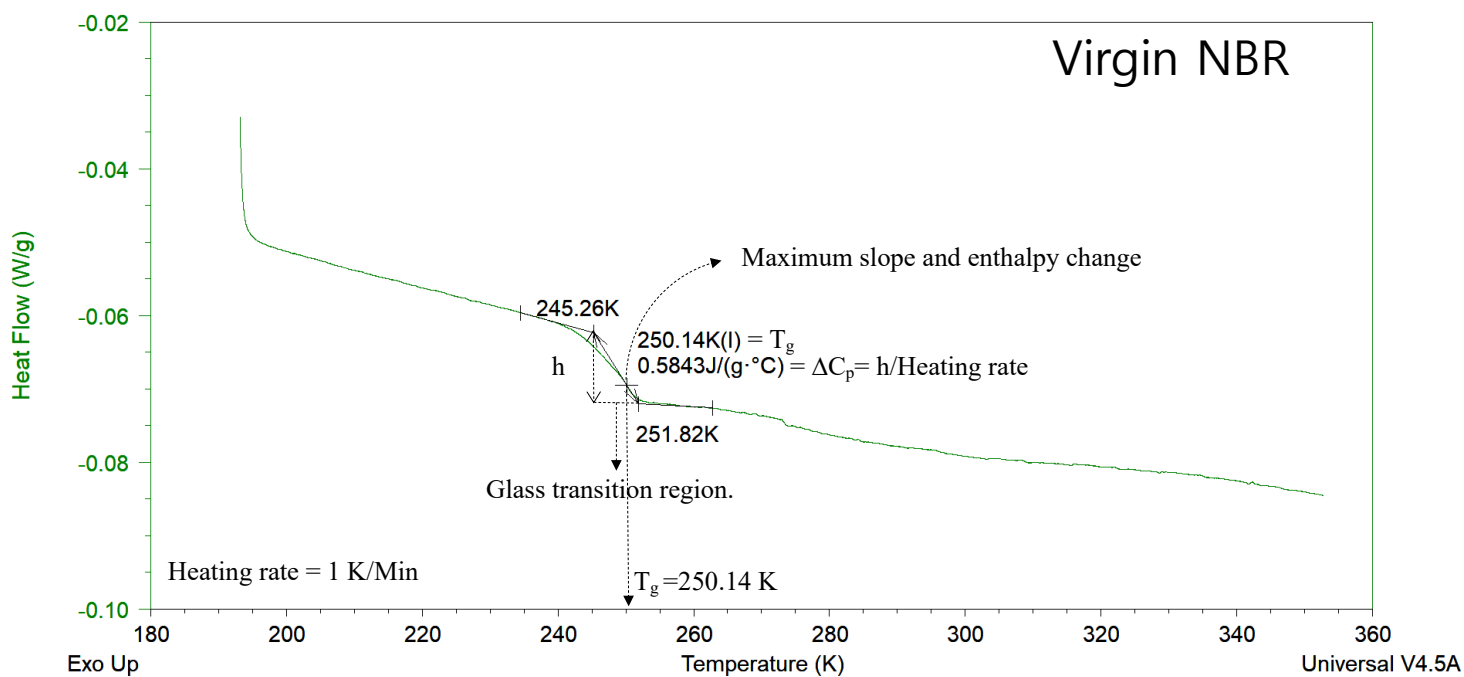

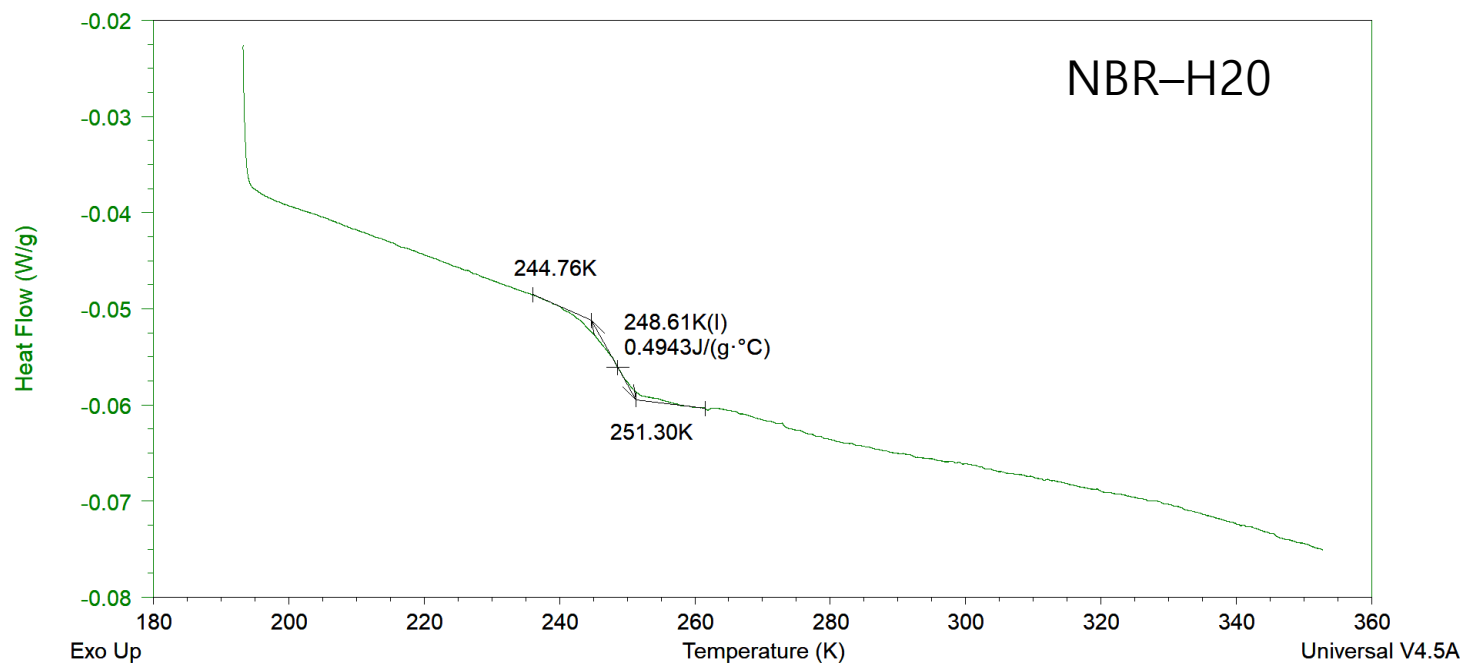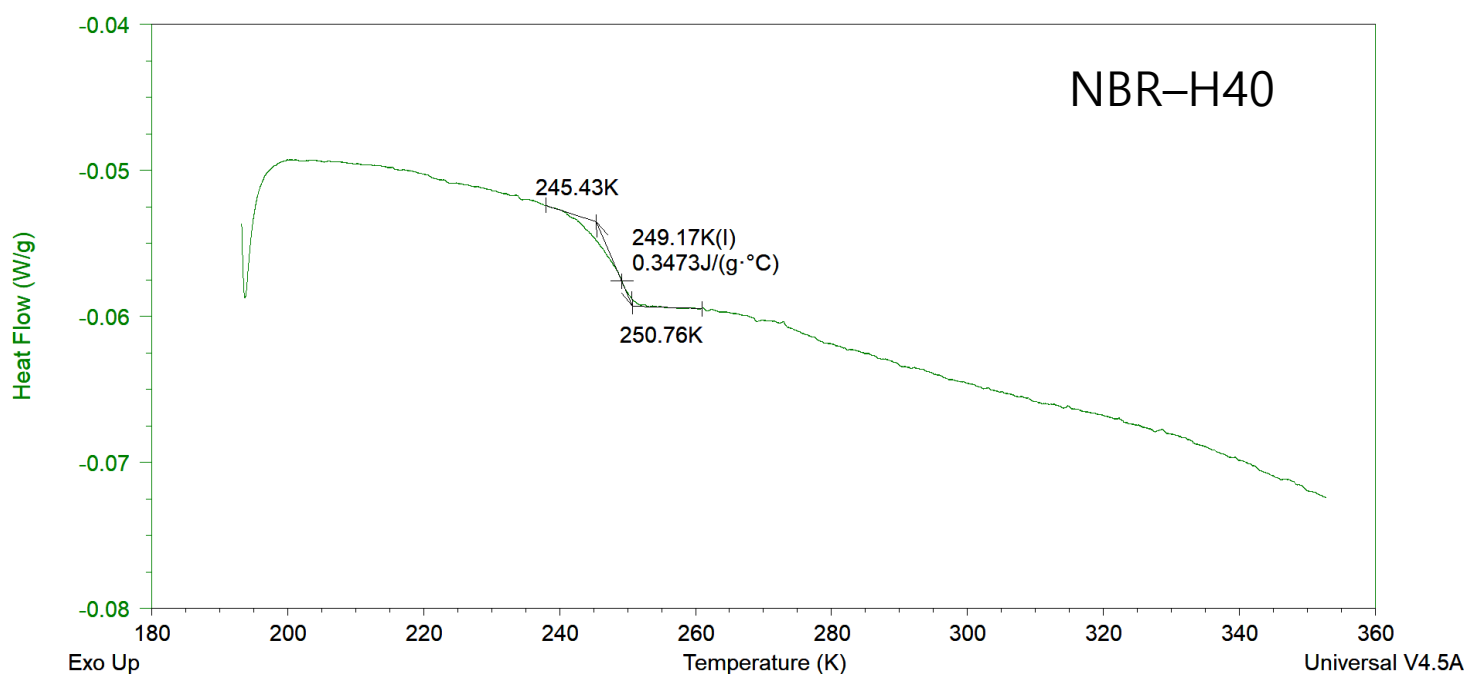

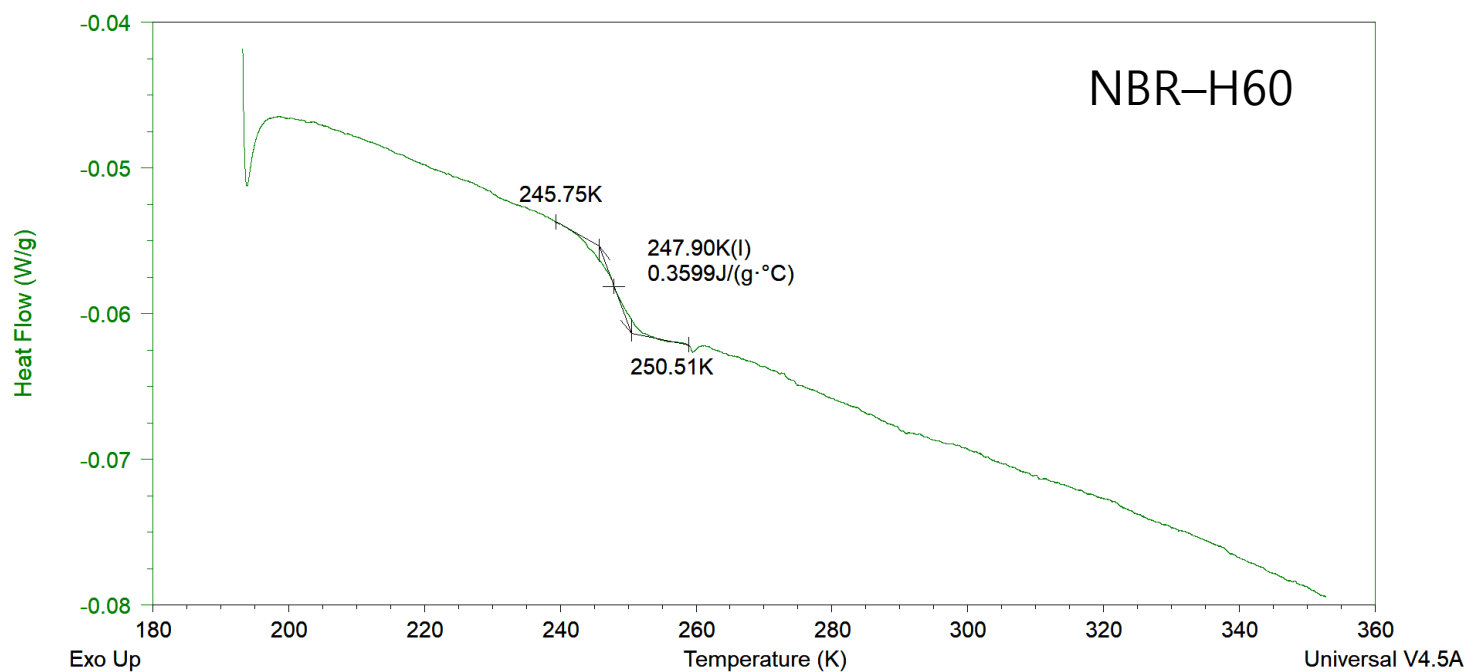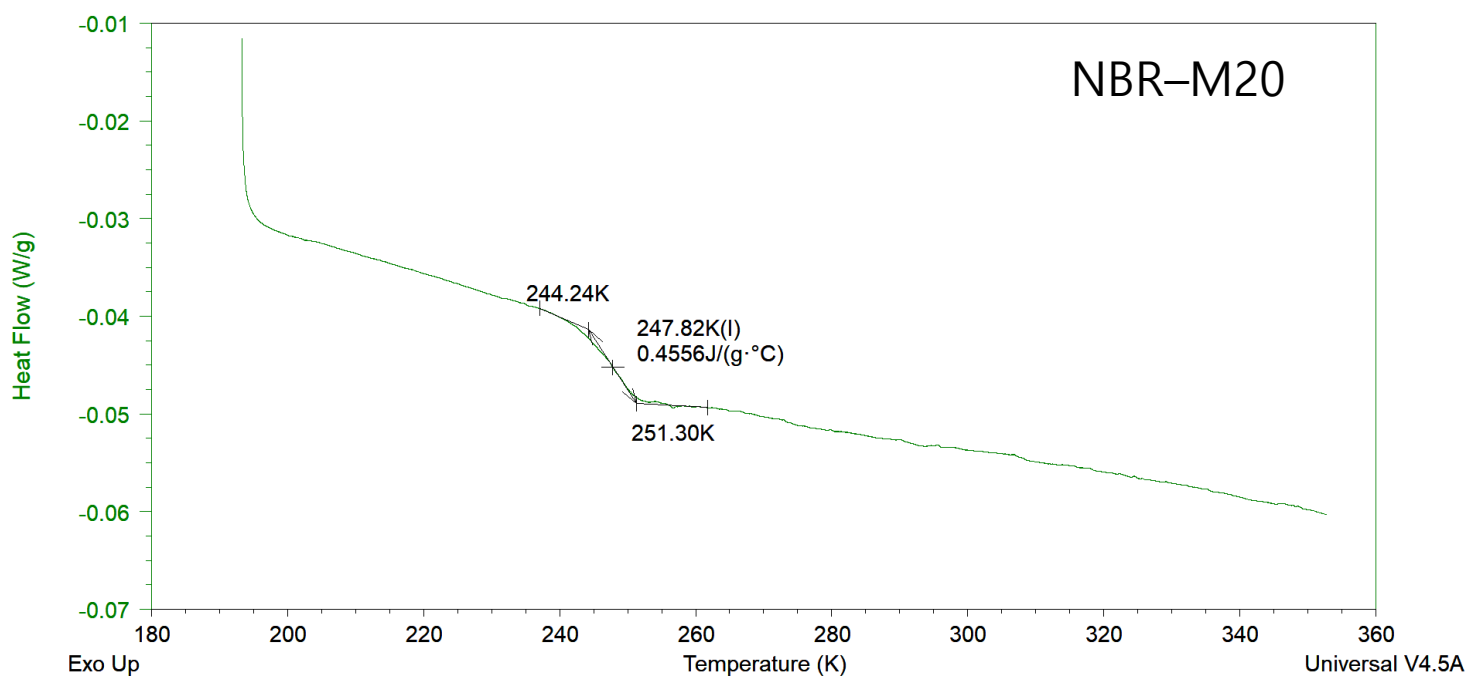

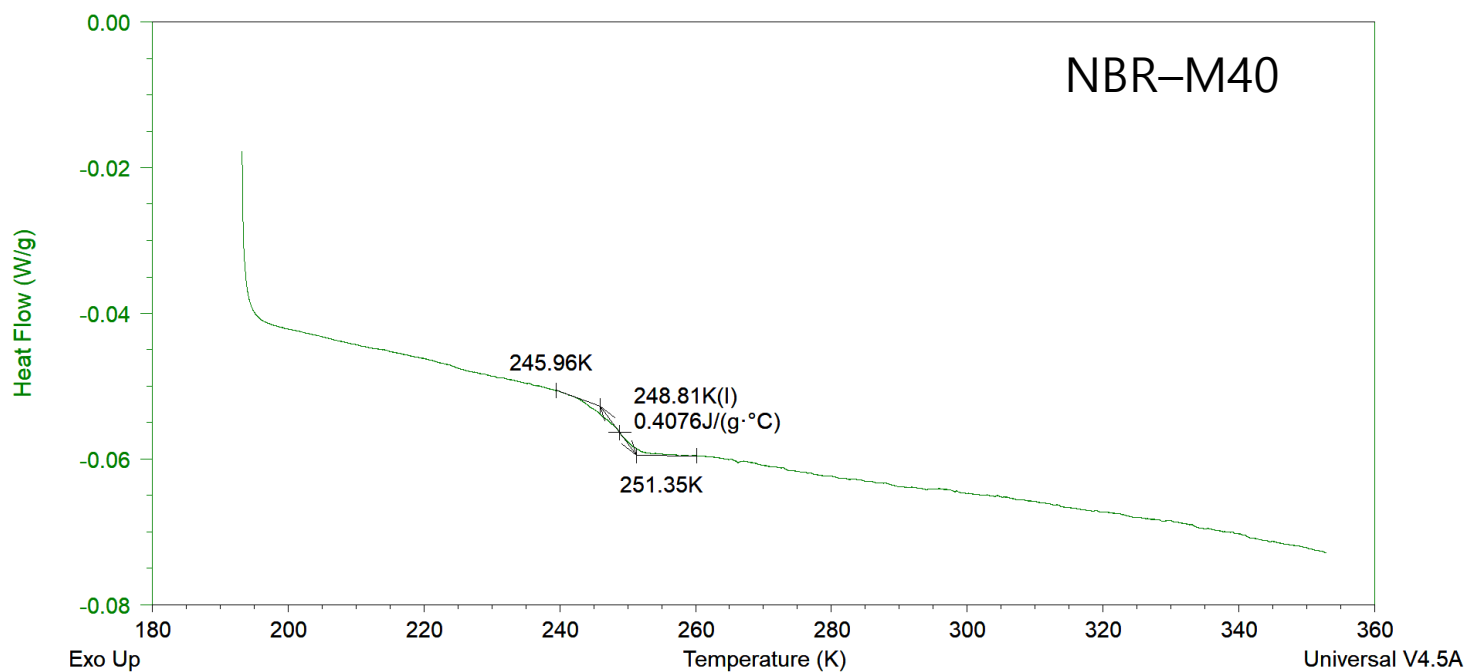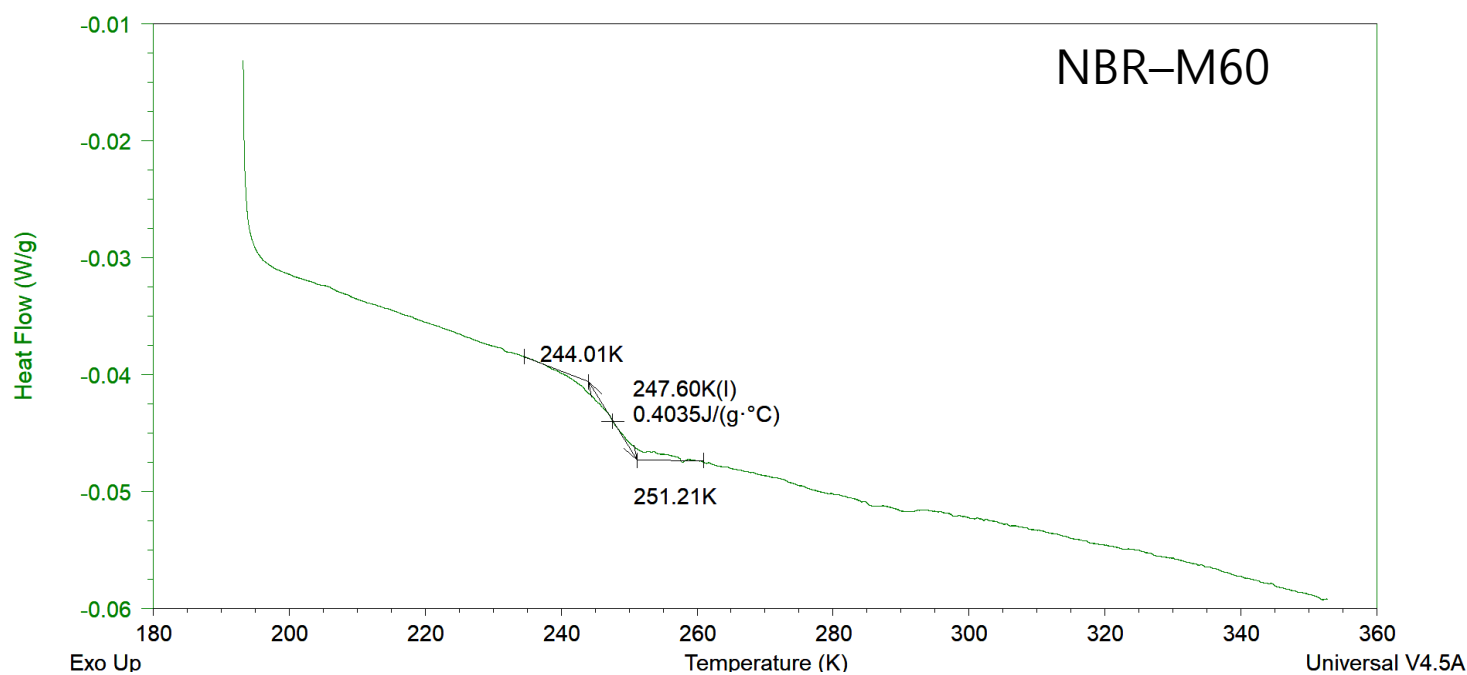

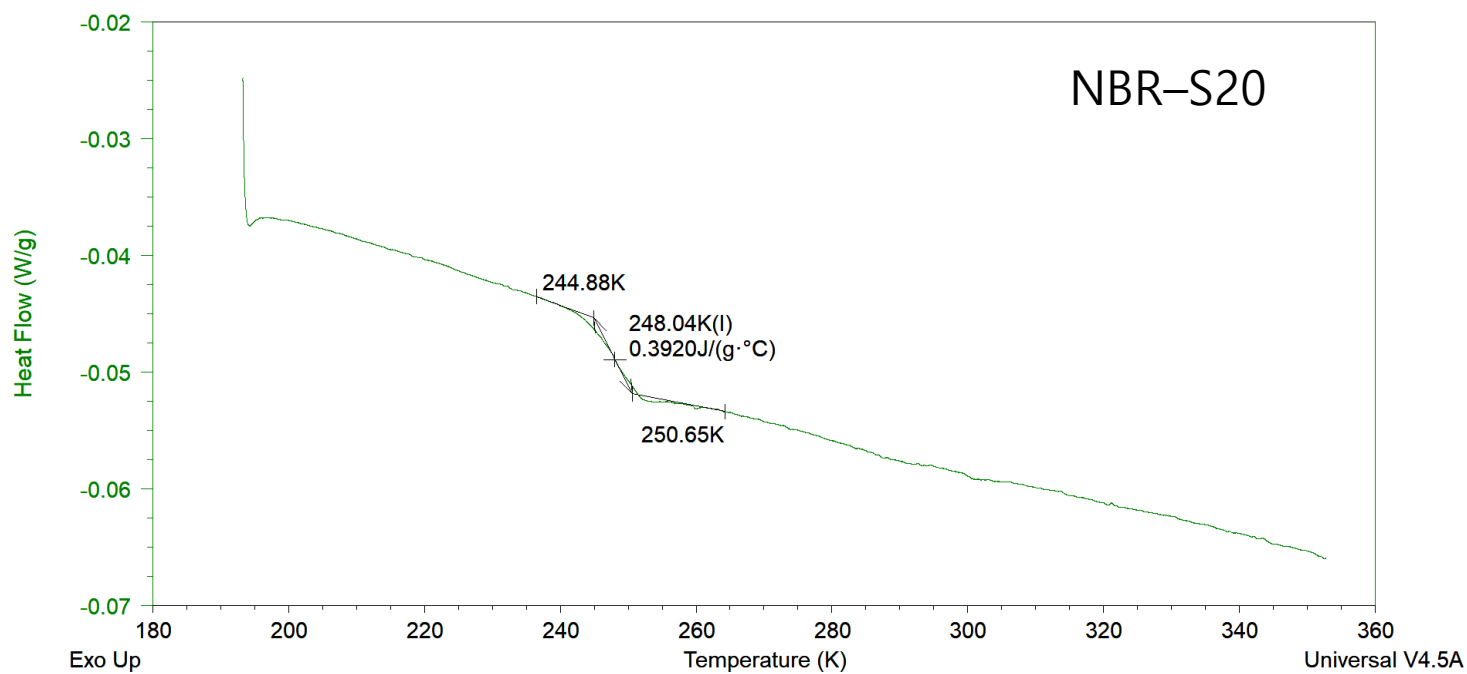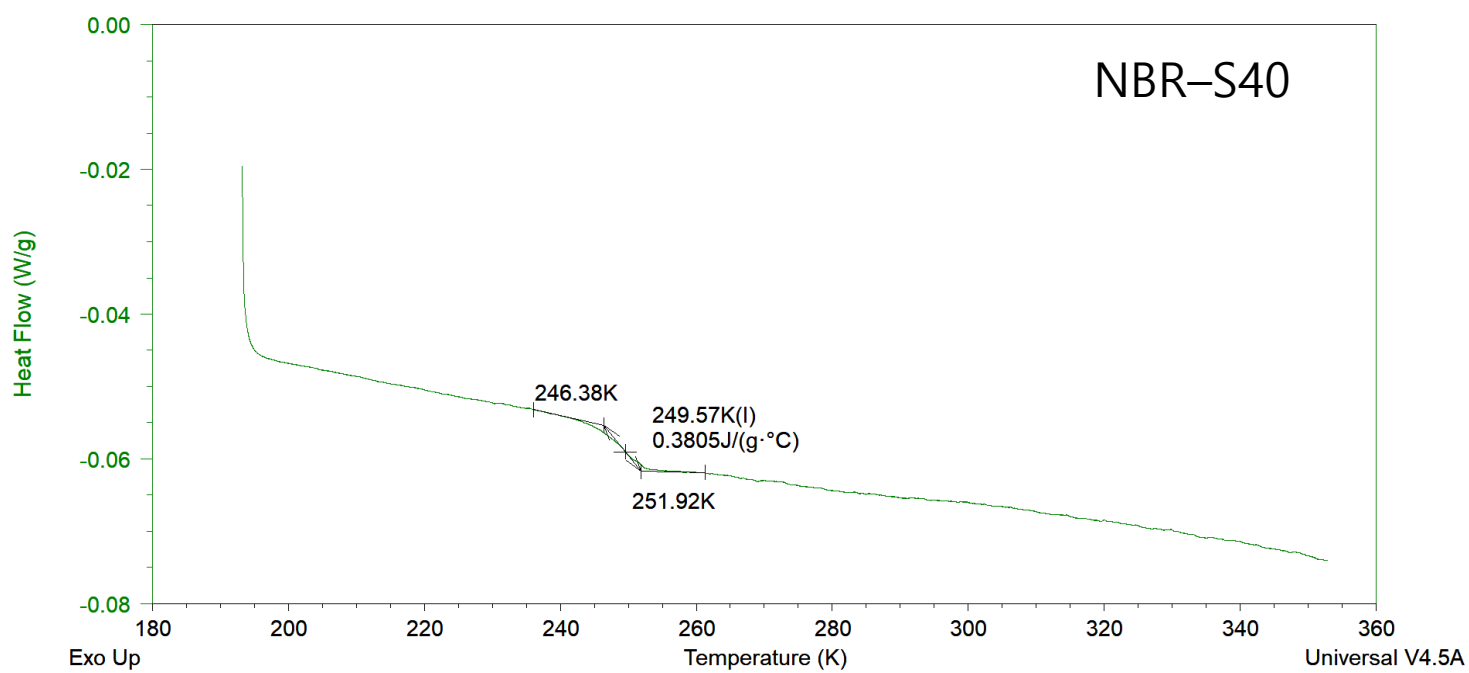

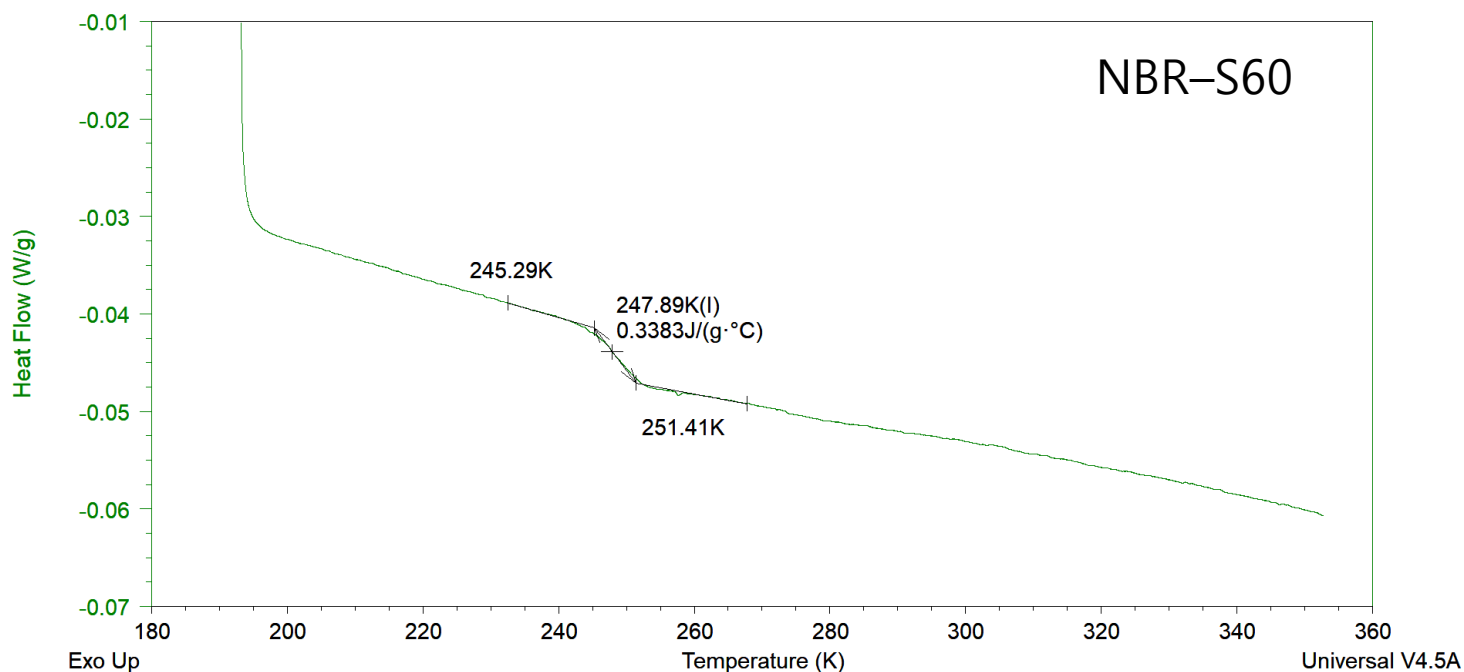

Figure S2. The measured heat flow curves of our NBR specimens by using DSC instrument. In virgin NBR, it shows the process of obtaining glass transition temperature and  $\Delta C_p$ . The glass transition is the temperature at the maximum slope(maximum enthalpy) in glass transition region.

## References

1. J.K. Jung, Y.I. Moon, G.H. Kim, N.H. Tak, Characterization of dielectric relaxation process by impedance spectroscopy for polymers: nitrile butadiene rubber and ethylene propylene diene monomer, *J. Spectrosc.* (2020) 8815492.
2. Y.I. Moon, J.K. Jung, G.H. Kim, K.S. Chung, Observation of the relaxation process in fluoroelastomers by dielectric relaxation spectroscopy, *Phys. B Condens. Matter* 608 (2021) 412870.
